# Supplementary material for: Genome-wide characterization of the xyloglucan endotransglucosylase/hydrolase gene family in Solanum lycopersicum L. and gene expression analysis in response to arbuscular mycorrhizal symbiosis
Source: PeerJ. 2023 May 3;11:e15257. doi: 10.7717/peerj.15257 (PMC10163873; doi:10.7717/peerj.15257)
Supplement: Supplemental Information 7 [file peerj-11-15257-s007.xlsx]

## Sheet: XTH2
			EF-XTH2									EF-XTH2
	SlXTH2	SlEF-α	CT differences	ΔCT						SlXTH2	SlEF-α	CT differences	ΔCT
NM1	17.46	19.33	2.47667	5.5661					Myc 1	15.057	19.11	4.19633	18.3325
	17.49	19.89	2.44667	5.45155						14.607	19.11	4.64633	25.043
	17.52	20.59	2.41667	5.33936						15.18	19.54	4.07333	16.8343
		19.9367									19.2533
	SlXTH2	SlEF-α	CT differences	ΔCT
NM2	16.94	20.23	3.31	9.91766						SlXTH2	SlEF-α	CT differences	ΔCT
	16.56	20.18	3.69	12.9063					Myc 2	16.383	19.57	4.35367	20.4449
	16.8	20.34	3.54	11.6318						16.354	20.98	4.38267	20.86
		20.25								16.36	21.66	4.37667	20.7734
											20.7367
	SlXTH2	SlEF-α	CT differences	ΔCT
NM3	16.28	19.5	3.59333	12.0698						SlXTH2	SlEF-α	CT differences	ΔCT
	16.086	19.99	3.78733	13.8071					Myc 3	17.473	21.32	4.31367	19.8858
	16.027	20.13	3.84633	14.3834						17.2	22.49	4.58667	24.0284
		19.8733								17.285	21.55	4.50167	22.6536
											21.7867

## Sheet: XTH14
													EF-XTH14
				EF-XTH14							SlXTH14	SlEF-α	CT differences	ΔCT
		SlXTH14	SlEF-α	CT differences	ΔCT					Myc 1	30.56	19.32	-11.33	0.000388446
	NM1	30.94	20.23	-10.69	0.000605326						30.74	19.22	-11.51	0.000342882
		29.24	20.18	-8.99	0.00196671						30.56	19.15	-11.33	0.000388446
		30.92	20.34	-10.58	0.000653285							19.23
			20.25
											SlXTH14	SlEF-α	CT differences	ΔCT
		SlXTH14	SlEF-α	CT differences	ΔCT					Myc 2	30.61	19.11	-11.3567	0.000381332
	NM2	29.46	19.5	-9.58667	0.00130055						30.89	19.11	-11.6367	0.000314061
		29.26	19.99	-9.38667	0.00149394						30.11	19.54	-10.8567	0.000539284
		29.17	20.13	-9.29667	0.0015901							19.2533
			19.8733
											SlXTH14	SlEF-α	CT differences	ΔCT
		SlXTH14	SlEF-α	CT differences	ΔCT					Myc 3	30.78	19.57	-10.0433	0.000947666
	NM3	28.25	18.3	-9.24333	0.00164998						31.49	20.98	-10.7533	0.000579327
		28.18	19.99	-9.17333	0.00173201						31.65	21.66	-10.9133	0.000518513
		28.77	18.73	-9.76333	0.00115065							20.7367
			19.0067

## Sheet: XTH7
				EF-XTH7									EF-XTH2
		SlXT7	SlEF-α	CT differences	ΔCT						SlXTH7	SlEF-α	CT differences	ΔCT
	NM1	36.21	19.33	-16.2733	1.26252e-05					Myc 1	35.86	19.32	-16.63	9.85987e-06
		35.89	19.89	-15.9533	1.57604e-05						36.81	19.22	-17.58	5.10379e-06
		36.53	20.59	-16.5933	1.01137e-05						36.26	19.15	-17.03	7.47238e-06
			19.9367									19.23
		SlXTH7	SlEF-α	CT differences	ΔCT						SlXTH7	SlEF-α	CT differences	ΔCT
	NM2	35.84	20.23	-15.59	2.02741e-05					Myc 2	36.82	19.11	-17.5667	5.15118e-06
		36.23	20.18	-15.98	1.54718e-05						35.91	19.11	-16.6567	9.67929e-06
		36.06	20.34	-15.72	1.85271e-05						35.87	19.54	-16.6167	9.95142e-06
			20.25									19.2533
		SlXTH7	SlEF-α	CT differences	ΔCT						SlXTH7	SlEF-α	CT differences	ΔCT
	NM3	35.56	18.3	-16.5533	1.0398e-05					Myc 3	36.77	19.91	-17.17	6.78133e-06
		35.57	19.99	-16.5633	1.03262e-05						36.55	19.1	-16.95	7.89844e-06
		35.34	18.73	-16.3333	1.21109e-05						36.87	19.79	-17.27	6.32721e-06
			19.0067									19.6

## Sheet: XTH9
				EF-XTH9									EF-XTH9
		SlXTH9	SlEF-α	CT differences	ΔCT						SlXTH9	SlEF-α	CT differences	ΔCT
	NM1	25.29	20.23	-5.04	0.0303955					Myc 1	28.26	19.91	-8.66	0.00247218
		25.91	20.18	-5.66	0.0197774						28.91	19.1	-9.31	0.00157547
		25.92	20.34	-5.58	0.0209051						29.33	19.79	-9.73	0.00117755
			20.25									19.6
		SlXTH9	SlEF-α	CT differences	ΔCT						SlXTH9	SlEF-α	CT differences	ΔCT
	NM2	25.65	19.5	-5.77667	0.0182411					Myc 2	29.47	19.57	-8.73333	0.00234966
		25.2	19.99	-5.32667	0.024918						29.77	20.98	-9.03333	0.00190852
		25.67	20.13	-5.79667	0.0179899						29.71	21.66	-8.97333	0.00198956
			19.8733									20.7367
											SlXTH9	SlEF-α	CT differences	ΔCT
		SlXTH9	SlEF-α	CT differences	ΔCT					Myc 3	30.69	21.32	-8.90333	0.00208848
	NM3	24.5	18.3	-5.49333	0.0221994						30.05	22.49	-8.26333	0.00325453
		24.76	19.99	-5.75333	0.0185385						30	21.55	-8.21333	0.0033693
		24.68	18.73	-5.67333	0.0195955							21.7867
			19.0067

## Sheet: XTH35
				EF-XTH35									EF-XTH35
		SlXTH35	SlEF-α	CT differences	ΔCT						SlXTH35	SlEF-α	CT differences	ΔCT
	NM1	25.29	20.23	-5.04	0.0303955					Myc 1	28.32	19.11	-9.06667	0.00186493
		25.91	20.18	-5.66	0.0197774						28.03	19.11	-8.77667	0.00228013
		25.92	20.34	-5.58	0.0209051						29.16	19.54	-9.90667	0.00104183
			20.25									19.2533
		SlXTH35	SlEF-α	CT differences	ΔCT						SlXTH35	SlEF-α	CT differences	ΔCT
	NM2	25.65	19.5	-5.77667	0.0182411					Myc 2	28.26	19.91	-8.66	0.00247218
		25.2	19.99	-5.32667	0.024918						28.91	19.1	-9.31	0.00157547
		25.67	20.13	-5.79667	0.0179899						29.33	19.79	-9.73	0.00117755
			19.8733									19.6
		SlXTH35	SlEF-α	CT differences	ΔCT						SlXTH35	SlEF-α	CT differences	ΔCT
	NM3	24.5	18.3	-5.49333	0.0221994					Myc 3	29.47	19.57	-8.73333	0.00234966
		24.76	19.99	-5.75333	0.0185385						29.77	20.98	-9.03333	0.00190852
		24.68	18.73	-5.67333	0.0195955						29.71	21.66	-8.97333	0.00198956
			19.0067									20.7367

## Sheet: XTH17
				EF-XTH17									EF-XTH17
		SlXTH17	SlEF-α	CT differences	ΔCT						SlXTH17	SlEF-α	CT differences	ΔCT
	NM 1	20.64	19.25	-0.733333	1.66248					Myc 1	19.8	19.11	-0.546667	1.46071
		19.39	19.96	0.516667	0.698985						18.1	19.11	1.15333	0.449585
		20.78	20.51	-0.873333	1.83189						18.98	19.54	0.273333	0.827406
			19.9067									19.2533
		SlXT17	SlEF-α	CT differences	ΔCT						SlXTH17	SlEF-α	CT differences	ΔCT
	NM2	20.35	19.33	-0.413333	1.33176					Myc 2	20.39	19.57	0.346667	0.786399
		19.84	19.89	0.0966667	0.935191						21.09	20.98	-0.353333	1.27751
		19.5	20.59	0.436667	0.73884						21.23	21.66	-0.493333	1.40769
			19.9367									20.7367
		SlXTH17	SlEF-α	CT differences	ΔCT						SlXTH17	SlEF-α	CT differences	ΔCT
	NM3	20.6	20.23	-0.35	1.27456					Myc 3	21.05	21.32	0.736667	0.600124
		20.51	20.18	-0.26	1.19748						22.23	22.49	-0.443333	1.35974
		20.92	20.34	-0.58	1.49485						22.45	21.55	-0.663333	1.58374
			20.25									21.7867

## Sheet: XTH3
				EF-XTH3									EF-XTH3
		SlXTH3	SlEF-α	CT differences	ΔCT						SlXTH3	SlEF-α	CT differences	ΔCT
	NM 1	25.65	19.25	-5.74333	0.0186674					Myc 1	30.21	19.11	-10.9567	0.00050317
		25.88	19.96	-5.97333	0.0159165						30.07	19.11	-10.8167	0.000554446
		25.84	20.51	-5.93333	0.016364						30.16	19.54	-10.9067	0.000520914
			19.9067									19.2533
		SlXTH3	SlEF-α	CT differences	ΔCT						SlXTH3	SlEF-α	CT differences	ΔCT
	NM2	25.34	19.5	-5.46667	0.0226136					Myc 2	30.75	19.91	-11.15	0.000440064
		25.89	19.99	-6.01667	0.0154455						30.25	19.1	-10.65	0.000622344
		24.93	20.13	-5.05667	0.0300463						30.32	19.79	-10.72	0.000592869
			19.8733									19.6
		SlXTH3	SlEF-α	CT differences	ΔCT						SlXTH3	SlEF-α	CT differences	ΔCT
	NM3	24.84	18.3	-5.83333	0.0175385					Myc 3	31.37	19.57	-10.6333	0.000629575
		25.15	19.99	-6.14333	0.0141473						31.33	20.98	-10.5933	0.000647275
		25.58	18.73	-6.57333	0.010501						31.56	21.66	-10.8233	0.000551889
			19.0067									20.7367

## Sheet: XTH21
					EF-XTH21									EF-XTH21
			SlXTH21	SlEF-α	CT differences	ΔCT						SlXTH21	SlEF-α	CT differences	ΔCT
		NM 1	21.21	19.25	-1.30333	0.405189					Myc 1	21.82	19.32	-2.59	0.166086
			21.31	19.96	-1.40333	0.378055						21.86	19.22	-2.63	0.161544
			21.41	20.51	-1.50333	0.352737						22.12	19.15	-2.89	0.134904
				19.9067									19.23
			SlXT21	SlEF-α	CT differences	ΔCT						SlXTH21	SlEF-α	CT differences	ΔCT
		NM2	21.54	19.33	-1.60333	0.329116					Myc 2	23.88	19.57	-3.14333	0.113178
			21.23	19.89	-1.29333	0.408007						23.41	20.98	-2.67333	0.156764
			21.34	20.59	-1.40333	0.378055						23.91	21.66	-3.17333	0.110849
				19.9367									20.7367
			SlXTH21	SlEF-α	CT differences	ΔCT						SlXTH21	SlEF-α	CT differences	ΔCT
		NM3	20.13	18.3	-1.12333	0.459032					Myc 3	24.94	21.32	-3.15333	0.112396
			20.32	19.99	-1.31333	0.40239						24.6	22.49	-2.81333	0.142266
			20.67	18.73	-1.66333	0.315709						25.13	21.55	-3.34333	0.0985273
				19.0067									21.7867

## Sheet: XTH6
					EF-XTH6
			SlXTH6	SlEF-α	CT differences	ΔCT						SlXTH6	SlEF-α	CT differences	ΔCT
		NM 1	27.88	19.25	-7.97333	0.00397912					Myc 1	29.64	19.11	-10.3867	0.000746968
			28.77	19.96	-8.86333	0.00214719						30.66	19.11	-11.4067	0.000368342
			27.99	20.51	-8.08333	0.00368701						29.65	19.54	-10.3967	0.000741808
				19.9067									19.2533
			SlXTH6	SlEF-α	CT differences	ΔCT						SlXTH6	SlEF-α	Diferencia CT	ΔCT
		NM2	28.37	20.23	-8.12	0.00359448					Myc 2	30.43	19.57	-9.69333	0.00120786
			27.83	20.18	-7.58	0.00522628						30.1	20.98	-9.36333	0.00151829
			28.06	20.34	-7.72	0.00474295						30.52	21.66	-9.78333	0.00113481
				20.25									20.7367
			SlXTH6	SlEF-α	CT differences	ΔCT						SlXTH6	SlEF-α	Diferencia CT	ΔCT
		NM3	27.1	18.3	-8.09333	0.00366154					Myc 3	31.02	21.32	-9.23333	0.00166146
			27.92	19.99	-8.91333	0.00207405						31.12	22.49	-9.33333	0.0015502
			27.52	18.73	-8.51333	0.00273673						31.5	21.55	-9.71333	0.00119123
				19.0067									21.7867
